# Supplementary material for: Emerging and Re-Emerging Diseases Caused by Badnaviruses
Source: MDPI journal article supplement (doi:10.3390/pathogens12020245), 2023-02-03
Supplement: s1 [file s1]

**Table S1.** Predicted recombination events detected with badnavirus isolates based on complete genome sequences.

| Event | Breakpoint             |                        | Recombinant              | Major parent <sup>a</sup>             | Minor parent <sup>a</sup>       | Method  | P value                  |
|-------|------------------------|------------------------|--------------------------|---------------------------------------|---------------------------------|---------|--------------------------|
|       | Begin                  | End                    |                          |                                       |                                 |         |                          |
| 1     | 3540                   | 2490                   | EU140339:BSMYV-TRY       | Unknown<br>(MW090055:BSMYV-IN6)       | AY805074:BSMYV-AUS              | RGBMCST | $6.192 \times 10^{-136}$ |
| 2     | 5046                   | Undetermined<br>(5101) | MW892537:JuMaV-HZ/AKS-6  | JN606110:CSSCDV-CI152-09              | KX852476:JuMaV-Z6               | RGMCS   | $9.606 \times 10^{-44}$  |
| 3     | 3174                   | 6270                   | MW052382:BSMYV-IN9       | KF724856:BSMYV-IN3                    | MW052383:BSMYV-IN10             | RGBMCST | $4.397 \times 10^{-14}$  |
| 4     | 6840                   | Undetermined<br>(6872) | KX852476:JuMaV-Z6        | OL739568:JuMaV-HZ/YPH-3               | MW116777:PYPMoV-Para            | RGM     | $2.240 \times 10^{-21}$  |
| 5     | Undetermined<br>(8154) | 126                    | AF357836:TaBV            | MW892537:JuMaV-HZ/AKS-6               | MG017323:TaBV-Ug75              | RGBM    | $5.919 \times 10^{-19}$  |
| 6     | Undetermined<br>(1)    | 63                     | MN296502:BSGFV-Yunnan    | Unknown<br>(OL423405:BSOLV-5-S68)     | FJ824813:SCBGAV1                | RGC     | $8.575 \times 10^{-05}$  |
| 7     | Undetermined<br>(3527) | Undetermined<br>(380)  | EU140339:BSMYV-TRY       | MW090055:BSMYV-IN6                    | AY805074:BSMYV-AUS              | GBMCST  | $3.546 \times 10^{-41}$  |
| 8     | Undetermined<br>(7490) | Undetermined<br>(7526) | HQ852251:GVBAV-RIB9001   | MZ220958:GVBAV-13C203                 | Unknown<br>(MG017323:TaBV-Ug75) | RGMT    | $9.680 \times 10^{-15}$  |
| 9     | 3174                   | 6270                   | MW052382:BSMYV-IN9       | Unknown<br>(KF724856:BSMYV-IN3)       | MW052383:BSMYV-IN10             | RGBMCST | $1.004 \times 10^{-19}$  |
| 10    | 29                     | 115                    | AF357836:TaBV            | HQ593110:BSUMV-Uganda                 | MG017321:TaBV-Ke52              | RGMS    | $4.415 \times 10^{-13}$  |
| 11    | 2808                   | 3003                   | JN606110:CSSCDV-CI152-09 | Unknown<br>(MF642734:CSSGQV-Gha53-15) | MG017327:TaBCHV-Ug10            | RGMCS   | $4.645 \times 10^{-13}$  |
| 12    | 626                    | 1567                   | KF724855:BSMYV-IN2       | Unknown<br>(MW090055:BSMYV-           | KF724854:BSMYV-IN1              | RGBMCST | $4.067 \times 10^{-48}$  |

|    |                     |                     |                              |                                     |                              |                |                             |
|----|---------------------|---------------------|------------------------------|-------------------------------------|------------------------------|----------------|-----------------------------|
|    |                     |                     |                              | IN6)                                |                              |                |                             |
| 13 | 6658                | 6786                | FJ824813:SCBGAV1             | MF642716:CSSTAV-Gha25-15            | OL423405:BSOLV-5-S68         | <b>RGBM</b>    | $1.119 \times 10^{-23}$     |
| 14 | Undetermined (7127) | Undetermined (68)   | ON086739:TaBCHV-PNG-P        | MF642720:CSSCEV-GWR198E-13          | KP710177:TaBCHV-2            | <b>RGBM</b>    | $2.126 \times 10^{-11}$     |
| 15 | Undetermined (18)   | 122                 | MG017321:TaBV-Ke52           | Unknown (X52938:ComYMV)             | AF357836:TaBV                | <b>RGBMCS</b>  | $6.082 \times 10^{-17}$     |
| 16 | 1                   | 44                  | MH404156:DBALV2-PNG58_DA     | OL874431:BSOLV-ITC1135              | MH404163:DBALV2-PNG12_DA     | <b>RGBM</b>    | $2.050 \times 10^{-11}$     |
| 17 | 7776                | Undetermined (8329) | MG686421:BLRaV-BpenGer407526 | MZ358192:RYNV-BiH                   | MG686420:BLRaV-BpubFin407501 | <b>GBS</b>     | $6.178 \times 10^{-10}$     |
| 18 | Undetermined (8270) | 81                  | FJ824813:SCBGAV1             | Unknown (OL423403:BSOLV-5-S75)      | HQ593108:BSUIV-Uganda        | <b>RGBM</b>    | $1.283 \times 10^{-05}$     |
| 19 | 3634                | 3820                | MG017324:TaBCHV-Et17         | MH404156:DBALV2-PNG58_DA            | KX276641:CYVBV-ICS27         | <b>RBS</b>     | $8.399 \times 10^{-08}$     |
| 20 | 3852                | 5903                | MW052382:BSMYV-IN9           | AY805074:BSMYV-AUS                  | MW052383:BSMYV-IN10          | <b>GBMCST</b>  | $7.414 \times 10^{-06}$     |
| 21 | Undetermined (3527) | 417                 | EU140339:BSMYV-TRY           | Unknown (KR014107:BSMYV-TO213_2010) | (MW090055:BSMYV-IN6)         | <b>RGBMCST</b> | $1.971 \times 10^{-98}$     |
| 22 | 3174                | 6270                | MW052382:BSMYV-IN9           | Unknown (KF724856:BSMYV-IN3)        | MW052383:BSMYV-IN10          | <b>RGBMCST</b> | $1.004 \times 10^{-19}$     |
| 23 | 8199                | 92                  | EU708317:CYMV                | MF642725:CSSGNV-Gha63-15            | EU708316:CYMV-SOP            | <b>RGMC</b>    | $2.785 \times 10^{-22}$     |
| 24 | 8188                | 62                  | KP710178:TaBCHV-1            | MF991952:GRLDaV-VLJ-178             | MG017324:TaBCHV-Et17         | <b>RGM</b>     | $4.102 \times 10^{-11}$     |
| 25 | 8272                | 120                 | AF357836:TaBV                | OL423403:BSOLV-5-S75)               | MG017323:TaBV-Ug75           | <b>RGM</b>     | $2.514.102 \times 10^{-19}$ |
| 26 | 8274                | 64                  | HQ593109:BSULV-Uganda        | Unknown (OL874431:BSOLV-            | MN296502:BSGFV-Yunnan        | <b>RGM</b>     | $1.968 \times 10^{-07}$     |

|    |                            |      |                                  |                                       |                                  |                |                          |
|----|----------------------------|------|----------------------------------|---------------------------------------|----------------------------------|----------------|--------------------------|
|    |                            |      |                                  | ITC1135)                              |                                  |                |                          |
| 27 | 4214                       | 4476 | MN716771:GVCV-TN1                | Unknown<br>(MH475918:PoMV-AR3)        | MF476845:DBRTV3                  | <b>RMCS</b>    | $1.324 \times 10^{-08}$  |
| 28 | 1833                       | 2031 | ON086738:TaBCHV-<br>PNG-K        | Unknown<br>(KM229702:YNMoV-<br>YV1)   | MF642724:CSSGMV-<br>Gha57-15     | <b>RB MCS</b>  | $7.305 \times 10^{-13}$  |
| 29 | 8292                       | 624  | JN006806:CYMV-ROL                | Unknown<br>(FJ617224:CYMV-Nagri)      | JN006805:CYMV-<br>SOJNTU         | <b>RBMCST</b>  | $7.075 \times 10^{-10}$  |
| 30 | 6097                       | 7245 | EU140339:BSMYV-TRY               | MW090055:BSMYV-IN6                    | AY805074:BSMYV-AUS               | <b>GBMS</b>    | $3.177 \times 10^{-61}$  |
| 31 | 4236                       | 5808 | EU140339:BSMYV-TRY               | Unknown<br>(MW090055:BSMYV-<br>IN6)   | AY805074:BSMYV-AUS               | <b>RGBMCST</b> | $3.079 \times 10^{-127}$ |
| 32 | 626                        | 1500 | FJ617224:CYMV-Nagri              | JN006805:CYMV-<br>SOJNTU              | Unknown<br>(JN006806:CYMV-ROL)   | <b>RBMCST</b>  | $1.177 \times 10^{-95}$  |
| 33 | Undetermined<br>(8192)-106 | 106  | MG686421:BLRaV-<br>BpenGer407526 | Unknown<br>(OL423411:BSOLV-3-<br>S34) | MG686420:BLRaV-<br>BpubFin407501 | <b>RGMCT</b>   | $3.838 \times 10^{-20}$  |
| 34 | 3174                       | 6270 | MW052382:BSMYV-IN9               | Unknown<br>(KF724856:BSMYV-IN3)       | MW052383:BSMYV-IN10              | <b>RGBMCST</b> | $1.044 \times 10^{-19}$  |

Recombination events detected using RDP4; <sup>a</sup>The sequence used to infer unknown parent is provided in brackets; Recombinant, major, and minor parents that contributed larger and smaller fractions of recombinant genomes, and the list of methods that detected the event are indicated (R: RDP; G: GENECONV; B: BOOTSCAN; M: MAXCHI; C: CHIMAERA; S: SISCAN; T: 3SEQ) with highest p-value indicated for the method shown in bold.
